# Supplementary material for: Yeast Irc22 Is a Novel Dsk2-Interacting Protein that Is Involved in Salt Tolerance
Source: MDPI journal article supplement (doi:10.3390/cells3020180), 2014-03-27
Supplement: s1 [file s1]

## Supplementary Materials

**Figure S1.** Degradation of N-end rule substrate Leu- $\beta$ -gal by overexpression and deletion of *IRC22*.

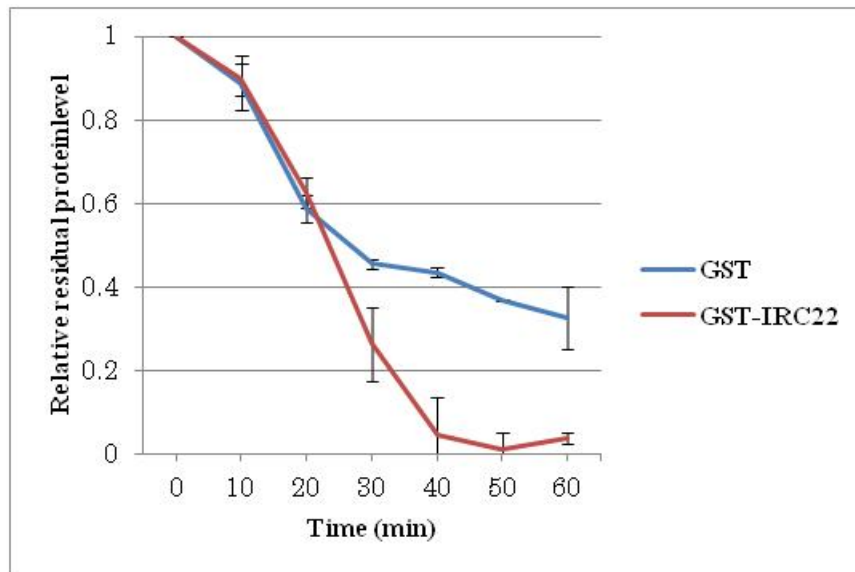

**A**

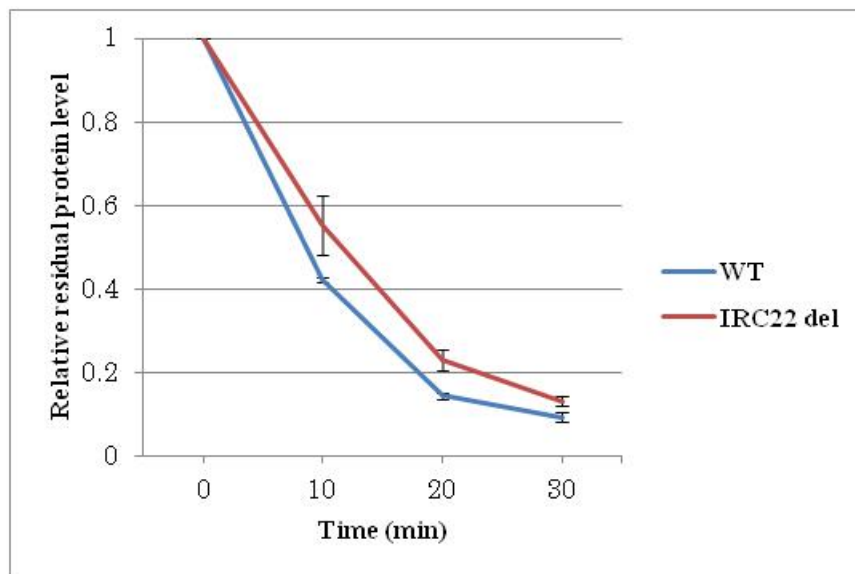

**B**

Based on the data in *IRC22* overexpression (Figure 3A) and in *irc22* $\Delta$  (Figure 3B), the degradation of Leu- $\beta$ -gal was quantified and plotted over time by using ImageJ. The mean values (% inhibition) were averaged by two or three independent experiments. (A) *IRC22* overexpression; (B) *irc22* $\Delta$ .
